# Supplementary material for: Exercise preserves fitness capacity during aging through AMPK and mitochondrial dynamics
Source: bioRxiv or medRxiv preprint supplement (doi:10.1101/2022.06.20.496837), 2022-06-20
Supplement: Supplementary file [file media-1.pdf]

## **Supplementary Information for**

### **Exercise preserves fitness capacity during aging through AMPK and mitochondrial dynamics**

Juliane Cruz Campos<sup>1</sup>, Luiz Henrique Marchesi Bozi<sup>1</sup>, Annika Traa, Alexander M van der Blik, Jeremy M. Van Raamsdonk, T. Keith Blackwell\*, and Julio Cesar Batista Ferreira\*

<sup>1</sup>These authors contributed equally to this work.

\*Corresponding authors

Email: [jcesarbf@usp.br](mailto:jcesarbf@usp.br) and [keith.blackwell@joslin.harvard.edu](mailto:keith.blackwell@joslin.harvard.edu)

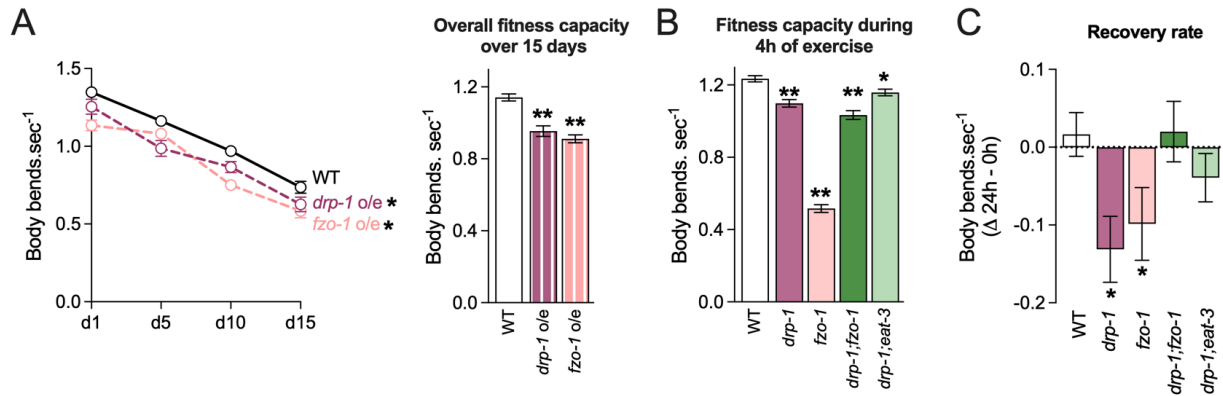

**Fig. S1. Impaired mitochondrial fission or fusion compromises fitness capacity (related to Fig. 2).** (A) Fitness capacity decay and overall fitness capacity (average of d1, d5, d10 and d15) of worms overexpressing mitochondrial dynamics genes *drp-1 o/e* and *fzo-1 o/e* with aging. (B) Fitness capacity during 4h of exercise and (C) recovery rate of WT and mitochondrial dynamics mutants *drp-1(tm1108)*, *fzo-1(tm1133)*, *drp-1(tm1108);fzo-1(tm1133)* and *drp-1(tm1108);eat-3(ad426)* submitted to acute exercise on day 1 of adulthood. Data are presented as mean  $\pm$  SEM. \*p < 0.05 and \*\*p < 0.001 vs. WT. Detailed statistical analyses, number of biological replicates and sample size are described in *SI Appendix*, Table S1.

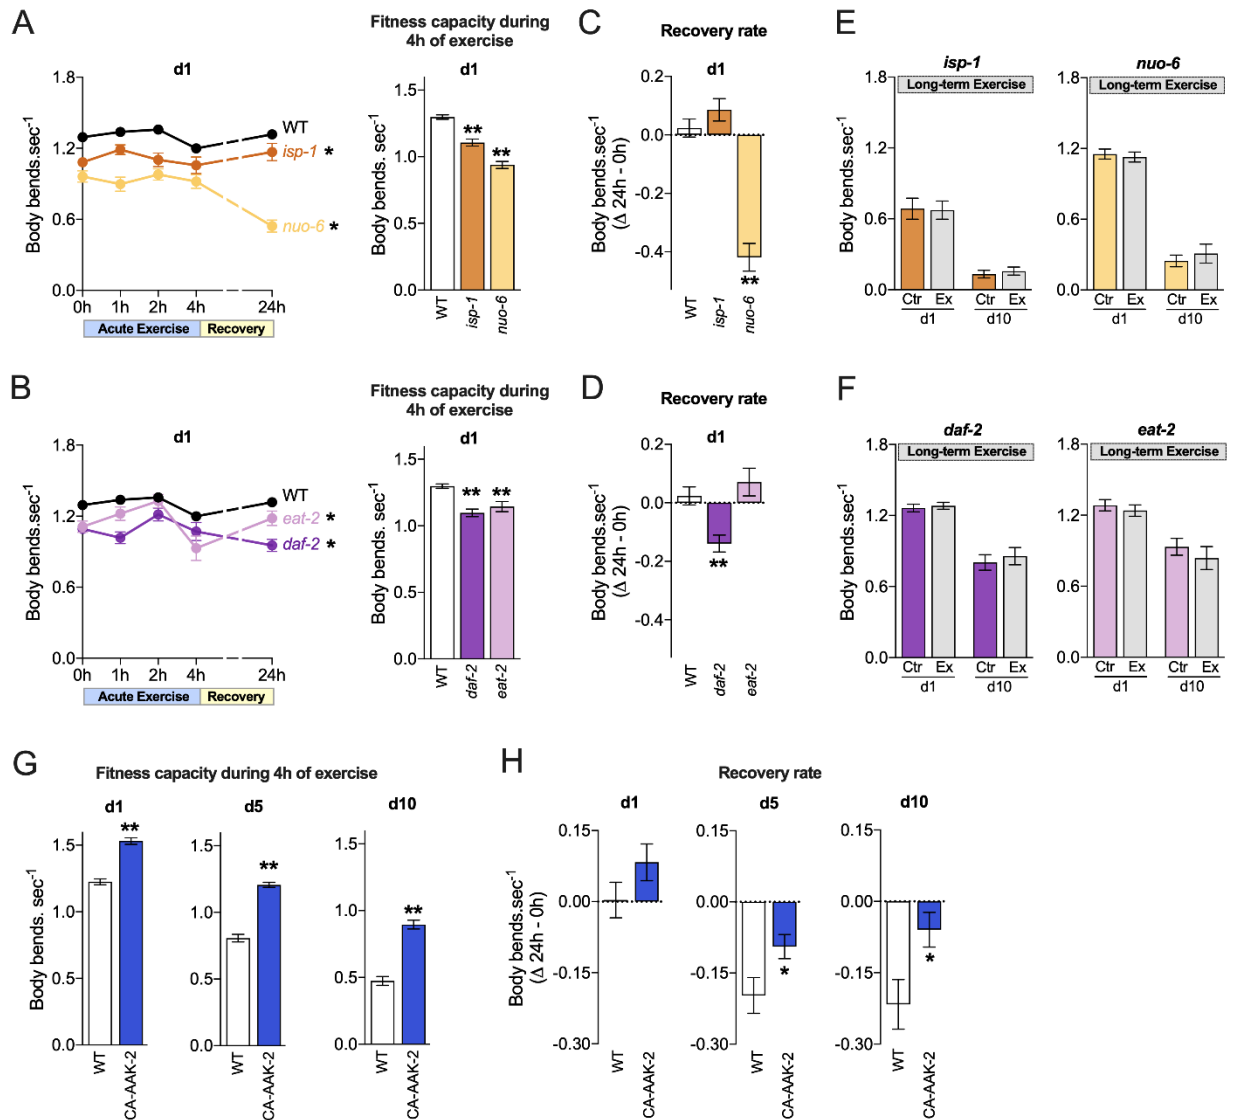

**Fig. S2. Long-lived mutants *isp-1*, *nuo-6*, *daf-2* and *eat-2* have decreased fitness capacity and exhibit no beneficial effects of exercise (related to Fig. 3).** (A, B) Fitness capacity during 4h of exercise and (C, D) recovery rate of WT, *isp-1(qm150)*, *nuo-6(qm200)*, *daf-2(e1370)* and *eat-2(ad1116)* worms submitted to acute exercise on day 1 of adulthood. (E, F) Fitness capacity of *isp-1(qm150)*, *nuo-6(qm200)*, *daf-2(e1370)* and *eat-2(ad1116)* worms submitted to long-term exercise. (G) Fitness capacity over 4h of exercise and (H) recovery rate of WT and CA-AAK-2 worms submitted to acute exercise on days 1, 5 and 10 of adulthood. Data are presented as mean  $\pm$  SEM. \*p < 0.05 and \*\*p < 0.001 vs. WT. Detailed statistical analyses, number of biological replicates and sample size are described in *SI Appendix*, Table S1.

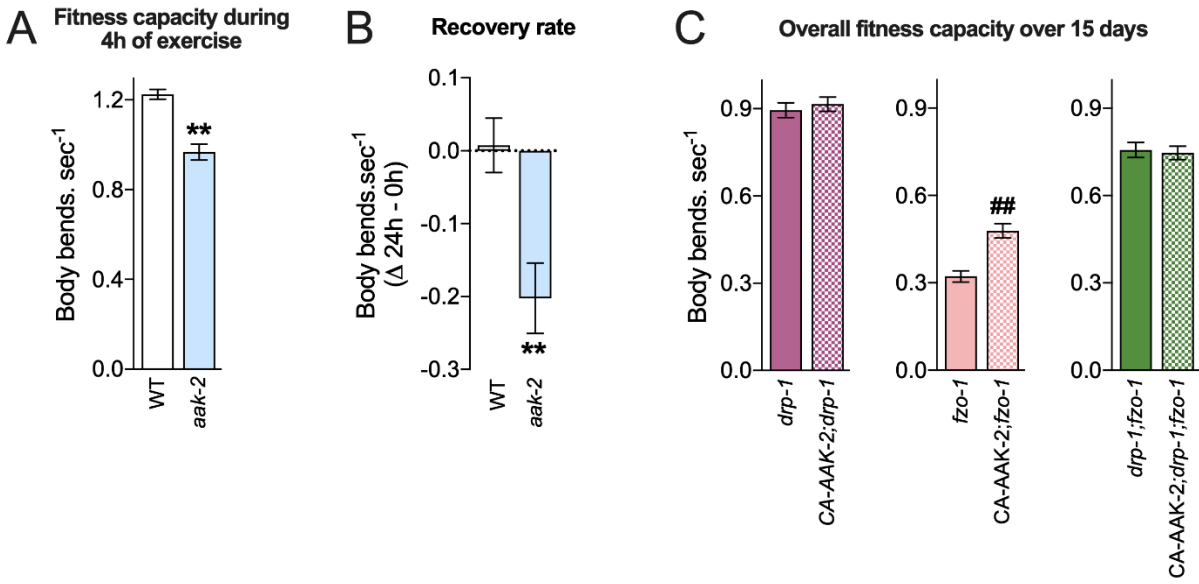

**Fig. S3. AMPK is required for exercise-induced benefits (related to Fig. 4).** (A) Fitness capacity during 4h of exercise and (B) recovery rate of WT and *aak-2(gt33)* worms submitted to acute exercise on day 1 of adulthood. (C) Overall fitness capacity (average of d1, d5, d10 and d15) of mitochondrial dynamics mutants *drp-1(tm1108)*, *fzo-1(tm1133)* and *drp-1(tm1108);fzo-1(tm1133)* in the absence or presence of CA-AAK-2 with aging. Data are presented as mean  $\pm$  SEM. \*\* $p < 0.001$  vs. WT and ## $p < 0.001$  vs. *fzo-1(tm1133)*. Detailed statistical analyses, number of biological replicates and sample size are described in *SI Appendix*, Table S1.

**Table S1. Biological replicates, sample size and statistical analyses.**

| Figure (Replicates) | Strain - Group                             | Sample size | Statistical analyses                         | p value          |
|---------------------|--------------------------------------------|-------------|----------------------------------------------|------------------|
| 1A (3)              | zcls14[myo-3::GFP(mito)] - d1              | 56          |                                              |                  |
|                     | zcls14[myo-3::GFP(mito)] - d5              | 67          | two-tailed Student's t vs. d1                | <.0001           |
|                     | zcls14[myo-3::GFP(mito)] - d10             | 66          | two-tailed Student's t vs. d1                | <.0001           |
|                     | zcls14[myo-3::GFP(mito)] - d15             | 45          | two-tailed Student's t vs. d1                | <.0001           |
| 1B (3)              | zcls14[myo-3::GFP(mito)] - d1              | 126         |                                              |                  |
|                     | zcls14[myo-3::GFP(mito)] - d5              | 173         | chi-square vs. d1                            | <.0001           |
|                     | zcls14[myo-3::GFP(mito)] - d10             | 151         | chi-square vs. d1                            | <.0001           |
| 1D (3)              | zcls14[myo-3::GFP(mito)] - d1 0h           | 126         |                                              |                  |
|                     | zcls14[myo-3::GFP(mito)] - d1 1h Exercise  | 138         | chi-square vs. d1 0h                         | <.0001           |
|                     | zcls14[myo-3::GFP(mito)] - d1 2h Exercise  | 149         | chi-square vs. d1 0h                         | <.0001           |
|                     | zcls14[myo-3::GFP(mito)] - d1 4h Exercise  | 173         | chi-square vs. d1 0h                         | <.0001           |
|                     | zcls14[myo-3::GFP(mito)] - d1 24h Recovery | 150         | chi-square vs. d1 0h<br>chi-square vs. d1 4h | 0.0001<br><.0001 |
| 1D (3)              | zcls14[myo-3::GFP(mito)] - d5 0h           | 156         |                                              |                  |
|                     | zcls14[myo-3::GFP(mito)] - d5 1h Exercise  | 159         | chi-square vs. d5 0h                         | 0.3565           |

|                                   |                                                                       |                |                                   |        |
|-----------------------------------|-----------------------------------------------------------------------|----------------|-----------------------------------|--------|
|                                   | zcls14[myo-3::GFP(mito)] - d5 2h Exercise                             | 165            | chi-square vs. d5 0h              | 0.0009 |
|                                   | zcls14[myo-3::GFP(mito)] - d5 4h Exercise                             | 154            | chi-square vs. d5 0h              | <.0001 |
|                                   | zcls14[myo-3::GFP(mito)] - d5 24h Recovery                            | 156            | chi-square vs. d5 0h              | 0.6592 |
|                                   |                                                                       |                | chi-square vs. d5 4h              | <.0001 |
| 1D<br>(2)                         | zcls14[myo-3::GFP(mito)] - d10 0h                                     | 135            |                                   |        |
|                                   | zcls14[myo-3::GFP(mito)] - d10 1h Exercise                            | 74             | chi-square vs. d10 0h             | 0.8980 |
|                                   | zcls14[myo-3::GFP(mito)] - d10 2h Exercise                            | 83             | chi-square vs. d10 0h             | 0.9652 |
|                                   | zcls14[myo-3::GFP(mito)] - d10 4h Exercise                            | 86             | chi-square vs. d10 0h             | 0.2928 |
|                                   | zcls14[myo-3::GFP(mito)] - d10 24h Recovery                           | 75             | chi-square vs. d10 0h             | 0.1979 |
| chi-square vs. d10 4h             |                                                                       |                | 0.0135                            |        |
| 1E<br>(3)                         | zcls14[myo-3::GFP(mito)] - d1 0h                                      | 56             |                                   |        |
|                                   | zcls14[myo-3::GFP(mito)] - d1 1h Exercise                             | 55             | two-tailed Student's t vs. d1 0h  | 0.1744 |
|                                   | zcls14[myo-3::GFP(mito)] - d1 2h Exercise                             | 53             | two-tailed Student's t vs. d1 0h  | 0.2839 |
|                                   | zcls14[myo-3::GFP(mito)] - d1 4h Exercise                             | 56             | two-tailed Student's t vs. d1 0h  | 0.0004 |
|                                   | zcls14[myo-3::GFP(mito)] - d1 24h Recovery                            | 37             | two-tailed Student's t vs. d1 0h  | 0.7309 |
| two-tailed Student's t vs. d1 4h  |                                                                       |                | 0.0010                            |        |
| 1E<br>(3)                         | zcls14[myo-3::GFP(mito)] - d5 0h                                      | 67             |                                   |        |
|                                   | zcls14[myo-3::GFP(mito)] - d5 1h Exercise                             | 65             | two-tailed Student's t vs. d5 0h  | 0.2880 |
|                                   | zcls14[myo-3::GFP(mito)] - d5 2h Exercise                             | 69             | two-tailed Student's t vs. d5 0h  | 0.0062 |
|                                   | zcls14[myo-3::GFP(mito)] - d5 4h Exercise                             | 70             | two-tailed Student's t vs. d5 0h  | <.0001 |
|                                   | zcls14[myo-3::GFP(mito)] - d5 24h Recovery                            | 64             | two-tailed Student's t vs. d5 0h  | 0.0444 |
| two-tailed Student's t vs. d5 4h  |                                                                       |                | 0.0002                            |        |
| 1E<br>(3)                         | zcls14[myo-3::GFP(mito)] - d10 0h                                     | 66             |                                   |        |
|                                   | zcls14[myo-3::GFP(mito)] - d10 1h Exercise                            | 66             | two-tailed Student's t vs. d10 0h | 0.0932 |
|                                   | zcls14[myo-3::GFP(mito)] - d10 2h Exercise                            | 68             | two-tailed Student's t vs. d10 0h | <.0001 |
|                                   | zcls14[myo-3::GFP(mito)] - d10 4h Exercise                            | 70             | two-tailed Student's t vs. d10 0h | <.0001 |
|                                   | zcls14[myo-3::GFP(mito)] - d10 24h Recovery                           | 59             | two-tailed Student's t vs. d10 0h | 0.0372 |
| two-tailed Student's t vs. d10 4h |                                                                       |                | <.0001                            |        |
| 1F<br>(3)                         | zcls14[myo-3::GFP(mito)] - d1 Recovery rate (24h - 0h)                | 56             |                                   |        |
|                                   | zcls14[myo-3::GFP(mito)] - d5 Recovery rate (24h - 0h)                | 67             | two-tailed Student's t vs d1      | 0.0073 |
|                                   | zcls14[myo-3::GFP(mito)] - d10 Recovery rate (24h - 0h)               | 65             | two-tailed Student's t vs d1      | 0.0050 |
| 1G<br>(3)                         | zcls14[myo-3::GFP(mito)] - d1 0h, 1hEx, 2hEx, 4hEx, 24hRec            | 5 (257)        | Linear Regression                 | <.0001 |
|                                   | zcls14[myo-3::GFP(mito)] - d5 0h, 1hEx, 2hEx, 4hEx, 24hRec            | 5 (335)        |                                   |        |
|                                   | zcls14[myo-3::GFP(mito)] - d10 0h, 1hEx, 2hEx, 4hEx, 24hRec           | 5 (329)        |                                   |        |
| 2B<br>(3)                         | N2 - d1, d5, d10, d15                                                 | 67, 63, 54, 49 |                                   |        |
|                                   | <i>drp-1(tm1108)</i> - d1, d5, d10, d15                               | 42, 48, 46, 48 | two-tailed Student's t vs. N2     | 0.0019 |
|                                   | <i>fzo-1(tm1133)</i> - d1, d5, d10, d15                               | 42, 42, 39, 44 | two-tailed Student's t vs. N2     | 0.0015 |
|                                   | <i>drp-1(tm1108);fzo-1(tm1133)</i> - d1, d5, d10, d15                 | 69, 70, 70, 65 | two-tailed Student's t vs. N2     | 0.0036 |
|                                   | <i>drp-1(tm1108);eat-3(ad426)</i> - d1, d5, d10, d15                  | 54, 48, 61, 57 | two-tailed Student's t vs. N2     | 0.0017 |
| 2B<br>(3)                         | N2 - Overall capacity (d1+d5+d10+d15)                                 | 233            |                                   |        |
|                                   | <i>drp-1(tm1108)</i> - Overall capacity (d1+d5+d10+d15)               | 184            | two-tailed Student's t vs. N2     | <.0001 |
|                                   | <i>fzo-1(tm1133)</i> - Overall capacity (d1+d5+d10+d15)               | 167            | two-tailed Student's t vs. N2     | <.0001 |
|                                   | <i>drp-1(tm1108);fzo-1(tm1133)</i> - Overall capacity (d1+d5+d10+d15) | 274            | two-tailed Student's t vs. N2     | <.0001 |

|           |                                                                      |                    |                                        |        |
|-----------|----------------------------------------------------------------------|--------------------|----------------------------------------|--------|
|           | <i>drp-1(tm1108);eat-3(ad426)</i> - Overall capacity (d1+d5+d10+d15) | 220                | two-tailed Student's t vs. N2          | <.0001 |
| 2C<br>(3) | N2 - d1 0h, 1h Ex, 2h Ex, 4h Ex, 24h Rec                             | 56, 55, 53, 56, 37 |                                        |        |
|           | <i>drp-1(tm1108)</i> - d1 0h, 1hEx, 2hEx, 4hEx, 24hRec               | 56, 64, 64, 66, 62 | two-tailed Student's t vs. N2 d1       | 0.0149 |
|           | <i>fzo-1(tm1133)</i> - d1 0h, 1hEx, 2hEx, 4hEx, 24hRec               | 51, 61, 61, 64, 51 | two-tailed Student's t vs. N2 d1       | <.0001 |
|           | <i>drp-1(tm1108);fzo-1(tm1133)</i> - d1 0h, 1hEx, 2hEx, 4hEx, 24hRec | 61, 65, 66, 69, 62 | two-tailed Student's t vs. N2 d1       | 0.0145 |
|           | <i>drp-1(tm1108);eat-3(ad426)</i> - d1 0h, 1hEx, 2hEx, 4hEx, 24hRec  | 64, 65, 66, 64, 58 | two-tailed Student's t vs. N2 d1       | 0.0388 |
| 2E<br>(3) | zcls14[myo-3::GFP(mito)] - Control d1                                | 67                 |                                        |        |
|           | zcls14[myo-3::GFP(mito)] - Exercise d1                               | 68                 | two-tailed Student's t vs. Control d1  | 0.6006 |
|           | zcls14[myo-3::GFP(mito)] - Control d5                                | 63                 |                                        |        |
|           | zcls14[myo-3::GFP(mito)] - Exercise d5                               | 44                 | two-tailed Student's t vs. Control d5  | 0.1348 |
|           | zcls14[myo-3::GFP(mito)] - Control d10                               | 54                 |                                        |        |
|           | zcls14[myo-3::GFP(mito)] - Exercise d10                              | 65                 | two-tailed Student's t vs. Control d10 | 0.0004 |
|           | zcls14[myo-3::GFP(mito)] - Control d15                               | 49                 |                                        |        |
|           | zcls14[myo-3::GFP(mito)] - Exercise d15                              | 59                 | two-tailed Student's t vs. Control d15 | <.0001 |
| 2F<br>(3) | zcls14[myo-3::GFP(mito)] - Control d5                                | 173                |                                        |        |
|           | zcls14[myo-3::GFP(mito)] - Exercise d5                               | 147                | chi-square vs. Control d5              | 0.0449 |
|           | zcls14[myo-3::GFP(mito)] - Control d10                               | 151                |                                        |        |
|           | zcls14[myo-3::GFP(mito)] - Exercise d10                              | 130                | chi-square vs. Control d10             | 0.0168 |
| 2G<br>(3) | zcls14[myo-3::GFP(mito)] - Control d5, d10                           | 2 (117)            |                                        |        |
|           | zcls14[myo-3::GFP(mito)] - Exercise d5, d10                          | 2 (109)            |                                        |        |
| 2H<br>(3) | <i>drp-1(tm1108)</i> - Control d1                                    | 52                 |                                        |        |
|           | <i>drp-1(tm1108)</i> - Exercise d1                                   | 53                 | two-tailed Student's t vs. Control d1  | 0.9518 |
|           | <i>drp-1(tm1108)</i> - Control d5                                    | 48                 |                                        |        |
|           | <i>drp-1(tm1108)</i> - Exercise d5                                   | 43                 | two-tailed Student's t vs. Control d5  | 0.0502 |
|           | <i>drp-1(tm1108)</i> - Control d10                                   | 46                 |                                        |        |
|           | <i>drp-1(tm1108)</i> - Exercise d10                                  | 43                 | two-tailed Student's t vs. Control d10 | 0.4028 |
|           | <i>drp-1(tm1108)</i> - Control d15                                   | 48                 |                                        |        |
|           | <i>drp-1(tm1108)</i> - Exercise d15                                  | 48                 | two-tailed Student's t vs. Control d15 | 0.4557 |
| 2H<br>(3) | <i>fzo-1(tm1133)</i> - Control d1                                    | 52                 |                                        |        |
|           | <i>fzo-1(tm1133)</i> - Exercise d1                                   | 52                 | two-tailed Student's t vs. Control d1  | 0.3720 |
|           | <i>fzo-1(tm1133)</i> - Control d5                                    | 42                 |                                        |        |
|           | <i>fzo-1(tm1133)</i> - Exercise d5                                   | 43                 | two-tailed Student's t vs. Control d5  | 0.3977 |
|           | <i>fzo-1(tm1133)</i> - Control d10                                   | 39                 |                                        |        |
|           | <i>fzo-1(tm1133)</i> - Exercise d10                                  | 40                 | two-tailed Student's t vs. Control d10 | 0.9599 |
|           | <i>fzo-1(tm1133)</i> - Control d15                                   | 44                 |                                        |        |
|           | <i>fzo-1(tm1133)</i> - Exercise d15                                  | 35                 | two-tailed Student's t vs. Control d15 | 0.0752 |
| 2H<br>(3) | <i>drp-1(tm1108);fzo-1(tm1133)</i> - Control d1                      | 69                 |                                        |        |
|           | <i>drp-1(tm1108);fzo-1(tm1133)</i> - Exercise d1                     | 69                 | two-tailed Student's t vs. Control d1  | 0.9146 |
|           | <i>drp-1(tm1108);fzo-1(tm1133)</i> - Control d5                      | 70                 |                                        |        |
|           | <i>drp-1(tm1108);fzo-1(tm1133)</i> - Exercise d5                     | 65                 | two-tailed Student's t vs. Control d5  | 0.0699 |
|           | <i>drp-1(tm1108);fzo-1(tm1133)</i> - Control d10                     | 70                 |                                        |        |
|           | <i>drp-1(tm1108);fzo-1(tm1133)</i> - Exercise d10                    | 63                 | two-tailed Student's t vs. Control d10 | 0.0462 |
|           | <i>drp-1(tm1108);fzo-1(tm1133)</i> - Control d15                     | 65                 |                                        |        |

|           |                                                       |                    |                                        |        |
|-----------|-------------------------------------------------------|--------------------|----------------------------------------|--------|
|           | <i>drp-1(tm1108);fzo-1(tm1133)</i> - Exercise d15     | 75                 | two-tailed Student's t vs. Control d15 | 0.0600 |
| 2H<br>(3) | <i>drp-1(tm1108);eat-3(ad426)</i> - Control d1        | 54                 |                                        |        |
|           | <i>drp-1(tm1108);eat-3(ad426)</i> - Exercise d1       | 55                 | two-tailed Student's t vs. Control d1  | 0.5846 |
|           | <i>drp-1(tm1108);eat-3(ad426)</i> - Control d5        | 48                 |                                        |        |
|           | <i>drp-1(tm1108);eat-3(ad426)</i> - Exercise d5       | 64                 | two-tailed Student's t vs. Control d5  | 0.1322 |
|           | <i>drp-1(tm1108);eat-3(ad426)</i> - Control d10       | 61                 |                                        |        |
|           | <i>drp-1(tm1108);eat-3(ad426)</i> - Exercise d10      | 68                 | two-tailed Student's t vs. Control d10 | 0.0085 |
|           | <i>drp-1(tm1108);eat-3(ad426)</i> - Control d15       | 57                 |                                        |        |
|           | <i>drp-1(tm1108);eat-3(ad426)</i> - Exercise d15      | 82                 | two-tailed Student's t vs. Control d15 | 0.0115 |
| 2I<br>(2) | <i>sid-1(qt-9);uths237;EV(RNAi)</i> - Control d1      | 24                 |                                        |        |
|           | <i>sid-1(qt-9);uths237;EV(RNAi)</i> - Exercise d1     | 24                 | two-tailed Student's t vs. Control d1  | 0.6546 |
|           | <i>sid-1(qt-9);uths237;EV(RNAi)</i> - Control d10     | 24                 |                                        |        |
|           | <i>sid-1(qt-9);uths237;EV(RNAi)</i> - Exercise d10    | 24                 | two-tailed Student's t vs. Control d10 | 0.0063 |
| 2I<br>(2) | <i>sid-1(qt-9);uths237;drp-1(RNAi)</i> - Control d1   | 21                 |                                        |        |
|           | <i>sid-1(qt-9);uths237;drp-1(RNAi)</i> - Exercise d1  | 24                 | two-tailed Student's t vs. Control d1  | 0.2646 |
|           | <i>sid-1(qt-9);uths237;drp-1(RNAi)</i> - Control d10  | 20                 |                                        |        |
|           | <i>sid-1(qt-9);uths237;drp-1(RNAi)</i> - Exercise d10 | 24                 | two-tailed Student's t vs. Control d10 | 0.2871 |
| 2I<br>(2) | <i>sid-1(qt-9);uths237;fzo-1(RNAi)</i> - Control d1   | 17                 |                                        |        |
|           | <i>sid-1(qt-9);uths237;fzo-1(RNAi)</i> - Exercise d1  | 24                 | two-tailed Student's t vs. Control d1  | 0.8048 |
|           | <i>sid-1(qt-9);uths237;fzo-1(RNAi)</i> - Control d10  | 24                 |                                        |        |
|           | <i>sid-1(qt-9);uths237;fzo-1(RNAi)</i> - Exercise d10 | 24                 | two-tailed Student's t vs. Control d10 | 0.5977 |
| 2I<br>(2) | <i>sid-1(qt-9);uths237;eat-3(RNAi)</i> - Control d1   | 24                 |                                        |        |
|           | <i>sid-1(qt-9);uths237;eat-3(RNAi)</i> - Exercise d1  | 24                 | two-tailed Student's t vs. Control d1  | 0.2244 |
|           | <i>sid-1(qt-9);uths237;eat-3(RNAi)</i> - Control d10  | 24                 |                                        |        |
|           | <i>sid-1(qt-9);uths237;eat-3(RNAi)</i> - Exercise d10 | 24                 | two-tailed Student's t vs. Control d10 | 0.4201 |
| 3A<br>(2) | N2 - d1                                               | 47                 |                                        |        |
|           | <i>isp-1(qm150)</i> - d1                              | 43                 | two-tailed Student's t vs. N2 d1       | <.0001 |
|           | <i>nuo-6(qm200)</i> - d1                              | 61                 | two-tailed Student's t vs. N2 d1       | <.0001 |
|           | <i>daf-2(e1370)</i> - d1                              | 57                 | two-tailed Student's t vs. N2 d1       | 0.0004 |
|           | <i>eat-2(ad1116)</i> - d1                             | 48                 | two-tailed Student's t vs. N2 d1       | 0.0043 |
| 3A<br>(2) | N2 - d10                                              | 42                 |                                        |        |
|           | <i>isp-1(qm150)</i> - d10                             | 33                 | two-tailed Student's t vs. N2 d10      | <.0001 |
|           | <i>nuo-6(qm200)</i> - d10                             | 33                 | two-tailed Student's t vs. N2 d10      | <.0001 |
|           | <i>daf-2(e1370)</i> - d10                             | 34                 | two-tailed Student's t vs. N2 d10      | 0.0032 |
|           | <i>eat-2(ad1116)</i> - d10                            | 31                 | two-tailed Student's t vs. N2 d10      | 0.5281 |
| 3B<br>(2) | N2 - d1, d5, d10, d15                                 | 38, 41, 42, 37     |                                        |        |
|           | CA-AAK-2 - d1, d5, d10, d15                           | 49, 37, 47, 50     | two-tailed Student's t vs. N2          | 0.0261 |
| 3B<br>(2) | N2 - Overall capacity (d1+d5+d10+d15)                 | 158                |                                        |        |
|           | CA-AAK-2 - Overall capacity (d1+d5+d10+d15)           | 183                | two-tailed Student's t vs. N2          | <.0001 |
| 3C<br>(2) | N2 - d1 0h, 1hEx, 2hEx, 4hEx, 24hRec                  | 38, 37, 36, 38, 37 |                                        |        |
|           | CA-AAK-2 - d1 0h, 1hEx, 2hEx, 4hEx, 24hRec            | 40, 39, 40, 40, 45 | two-tailed Student's t vs. N2 d1       | 0.0094 |
| 3C<br>(2) | N2 - d5 0h, 1hEx, 2hEx, 4hEx, 24hRec                  | 45, 44, 47, 46, 42 |                                        |        |
|           | CA-AAK-2 - d5 0h, 1hEx, 2hEx, 4hEx, 24hRec            | 45, 45, 44, 45, 47 | two-tailed Student's t vs. N2 d5       | 0.0013 |
| 3C        | N2 - d10 0h, 1hEx, 2hEx, 4hEx, 24hRec                 | 44, 41, 44, 45, 36 |                                        |        |

|                                                                 |                                                                                 |                                     |                                         |        |
|-----------------------------------------------------------------|---------------------------------------------------------------------------------|-------------------------------------|-----------------------------------------|--------|
| (2)                                                             | CA-AAK-2 - d10 0h, 1hEx, 2hEx, 4hEx, 24hRec                                     | 44, 45, 46, 45, 43                  | two-tailed Student's t vs. N2 d10       | 0.0005 |
| 3D<br>(2)                                                       | CA-AAK-2 - Control d1                                                           | 49                                  |                                         |        |
|                                                                 | CA-AAK-2 - Exercise d1                                                          | 40                                  | two-tailed Student's t vs. Control d1   | 0.7949 |
|                                                                 | CA-AAK-2 - Control d5                                                           | 37                                  |                                         |        |
|                                                                 | CA-AAK-2 - Exercise d5                                                          | 47                                  | two-tailed Student's t vs. Control d5   | <.0001 |
|                                                                 | CA-AAK-2 - Control d10                                                          | 47                                  |                                         |        |
|                                                                 | CA-AAK-2 - Exercise d10                                                         | 40                                  | two-tailed Student's t vs. Control d10  | <.0001 |
|                                                                 | CA-AAK-2 - Control d15                                                          | 50                                  |                                         |        |
|                                                                 | CA-AAK-2 - Exercise d15                                                         | 50                                  | two-tailed Student's t vs. Control d15  | 0.0079 |
| 4A<br>(2)                                                       | N2 - d1, d5, d10, d15                                                           | 47, 41, 42, 37                      |                                         |        |
|                                                                 | <i>aak-2(gt33)</i> -- d1, d5, d10, d15                                          | 45, 52, 44, 29                      | two-tailed Student's t vs. N2           | 0.0951 |
| 4A<br>(2)                                                       | N2 - Overall capacity (d1+d5+d10+d15)                                           | 167                                 |                                         |        |
|                                                                 | <i>aak-2(gt33)</i> - Overall capacity (d1+d5+d10+d15)                           | 170                                 | two-tailed Student's t vs. N2           | 0.0010 |
| 4B<br>(2)                                                       | N2 - d1 0h, 1hEx, 2hEx, 4hEx, 24hRec                                            | 38, 37, 36, 38, 40                  |                                         |        |
|                                                                 | <i>aak-2(gt33)</i> - d1 0h, 1hEx, 2hEx, 4hEx, 24hRec                            | 38, 39, 39, 38, 45                  | two-tailed Student's t vs. N2 d1        | 0.0035 |
| 4C<br>(2)                                                       | <i>aak-2(gt33)</i> - Control d1                                                 | 45                                  |                                         |        |
|                                                                 | <i>aak-2(gt33)</i> - Exercise d1                                                | 45                                  | two-tailed Student's t vs. Control d1   | 0.9269 |
|                                                                 | <i>aak-2(gt33)</i> - Control d5                                                 | 52                                  |                                         |        |
|                                                                 | <i>aak-2(gt33)</i> - Exercise d5                                                | 41                                  | two-tailed Student's t vs. Control d5   | 0.6691 |
|                                                                 | <i>aak-2(gt33)</i> - Control d10                                                | 44                                  |                                         |        |
|                                                                 | <i>aak-2(gt33)</i> - Exercise d10                                               | 39                                  | two-tailed Student's t vs. Control d10  | 0.0003 |
|                                                                 | <i>aak-2(gt33)</i> - Control d15                                                | 29                                  |                                         |        |
|                                                                 | <i>aak-2(gt33)</i> - Exercise d15                                               | 44                                  | two-tailed Student's t vs. Control d15  | <.0001 |
| 4D<br>(3)                                                       | N2 - d1, d5, d10, d15                                                           | 62, 61, 56, 61                      |                                         |        |
|                                                                 | CA-AAK-2 - d1, d5, d10, d15                                                     | 63, 84, 69, 71                      | two-tailed Student's t vs. N2           | 0.0463 |
|                                                                 | CA-AAK-2; <i>drp-1(tm1108)</i> - d1, d5, d10, d15                               | 70, 90, 68, 69                      | two-tailed Student's t vs. N2           | 0.2522 |
|                                                                 | CA-AAK-2; <i>fzo-1(tm1103)</i> - d1, d5, d10, d15                               | 82, 72, 66, 65                      | two-tailed Student's t vs. CA-AAK-2     | 0.0486 |
|                                                                 | CA-AAK-2; <i>fzo-1(tm1103)</i> - d1, d5, d10, d15                               | 82, 72, 66, 65                      | two-tailed Student's t vs. N2           | 0.0204 |
|                                                                 | CA-AAK-2; <i>fzo-1(tm1103)</i> - d1, d5, d10, d15                               | 82, 72, 66, 65                      | two-tailed Student's t vs. CA-AAK-2     | 0.0023 |
|                                                                 | CA-AAK-2; <i>drp-1(tm1108);fzo-1(tm1133)</i> - d1, d5, d10, d15                 | 57, 60, 60, 60                      | two-tailed Student's t vs. N2           | 0.0322 |
| CA-AAK-2; <i>drp-1(tm1108);fzo-1(tm1133)</i> - d1, d5, d10, d15 | 57, 60, 60, 60                                                                  | two-tailed Student's t vs. CA-AAK-2 | <.0001                                  |        |
| 4D<br>(3)                                                       | N2 - Overall capacity (d1+d5+d10+d15)                                           | 240                                 |                                         |        |
|                                                                 | CA-AAK-2 - Overall capacity (d1+d5+d10+d15)                                     | 287                                 | two-tailed Student's t vs. N2           | <.0001 |
|                                                                 | CA-AAK-2; <i>drp-1(tm1108)</i> - Overall capacity (d1+d5+d10+d15)               | 297                                 | two-tailed Student's t vs. N2           | 0.0992 |
|                                                                 | CA-AAK-2; <i>drp-1(tm1108)</i> - Overall capacity (d1+d5+d10+d15)               | 297                                 | two-tailed Student's t vs. CA-AAK-2     | <.0001 |
|                                                                 | CA-AAK-2; <i>fzo-1(tm1103)</i> - Overall capacity (d1+d5+d10+d15)               | 285                                 | two-tailed Student's t vs. N2           | <.0001 |
|                                                                 | CA-AAK-2; <i>fzo-1(tm1103)</i> - Overall capacity (d1+d5+d10+d15)               | 285                                 | two-tailed Student's t vs. CA-AAK-2     | <.0001 |
| 4E<br>(3)                                                       | CA-AAK-2; <i>drp-1(tm1108);fzo-1(tm1133)</i> - Overall capacity (d1+d5+d10+d15) | 237                                 | two-tailed Student's t vs. N2           | <.0001 |
|                                                                 | CA-AAK-2; <i>drp-1(tm1108);fzo-1(tm1133)</i> - Overall capacity (d1+d5+d10+d15) | 237                                 | two-tailed Student's t vs. CA-AAK-2     | <.0001 |
| 4E<br>(3)                                                       | <i>drp-1(tm1108)</i> - d1, d5, d10, d15                                         | 56, 68, 64, 41                      |                                         |        |
|                                                                 | CA-AAK-2; <i>drp-1(tm1108)</i> - d1, d5, d10, d15                               | 64, 62, 66, 69                      | two-tailed Student's t vs. <i>drp-1</i> | 0.1506 |
| 4E<br>(3)                                                       | <i>fzo-1(tm1133)</i> - d1, d5, d10, d15                                         | 51, 57, 52, 50                      |                                         |        |
|                                                                 | CA-AAK-2; <i>fzo-1(tm1133)</i> - d1, d5, d10, d15                               | 67, 72, 66, 65                      | two-tailed Student's t vs. <i>fzo-1</i> | 0.2512 |
| 4E                                                              | <i>drp-1(tm1108);fzo-1(tm1133)</i> - d1, d5, d10, d15                           | 61, 70, 56, 65                      |                                         |        |



|              |                                                                                 |                    |                                               |        |
|--------------|---------------------------------------------------------------------------------|--------------------|-----------------------------------------------|--------|
| (3)          | CA-AAK-2; <i>drp-1(tm1108);fzo-1(tm1133)</i> - d1, d5, d10, d15                 | 57, 60, 60, 60     | two-tailed Student's t vs. <i>drp-1;fzo-1</i> | 0.9715 |
| S1A<br>(2-3) | N2 - d1, d5, d10, d15                                                           | 81, 43, 68, 48     |                                               |        |
|              | <i>drp-1 o/e</i> - d1, d5, d10, d15                                             | 39, 39, 40, 29     | two-tailed Student's t vs. N2                 | 0.0075 |
|              | <i>fzo-1 o/e</i> - d1, d5, d10, d15                                             | 64, 61, 66, 43     | two-tailed Student's t vs. N2                 | 0.0142 |
| S1A<br>(2-3) | N2 - Overall capacity (d1+d5+d10+d15)                                           | 240                |                                               |        |
|              | <i>drp-1 o/e</i> - Overall capacity (d1+d5+d10+d15)                             | 147                | two-tailed Student's t vs. N2                 | <.0001 |
|              | <i>fzo-1 o/e</i> - Overall capacity (d1+d5+d10+d15)                             | 234                | two-tailed Student's t vs. N2                 | <.0001 |
| S1B<br>(3)   | N2 - Fitness capacity d1 (0h+ 1hEx+ 2hEx+ 4hEx)                                 | 220                |                                               |        |
|              | <i>drp-1(tm1108)</i> - Fitness capacity d1 (0h+ 1hEx+ 2hEx+ 4hEx)               | 250                | two-tailed Student's t vs. N2 d1              | <.0001 |
|              | <i>fzo-1(tm1133)</i> - Fitness capacity d1 (0h+ 1hEx+ 2hEx+ 4hEx)               | 237                | two-tailed Student's t vs. N2 d1              | <.0001 |
|              | <i>drp-1(tm1108);fzo-1(tm1133)</i> - Fitness capacity d1 (0h+ 1hEx+ 2hEx+ 4hEx) | 261                | two-tailed Student's t vs. N2 d1              | <.0001 |
|              | <i>drp-1(tm1108);eat-3(ad426)</i> - Fitness capacity d1 (0h+ 1hEx+ 2hEx+ 4hEx)  | 259                | two-tailed Student's t vs. N2 d1              | 0.0027 |
| S1C<br>(3)   | N2 - d1 Recovery rate (24h - 0h)                                                | 56                 |                                               |        |
|              | <i>drp-1(tm1108)</i> - d1 Recovery rate (24h - 0h)                              | 56                 | two-tailed Student's t vs. N2 d1              | 0.0046 |
|              | <i>fzo-1(tm1133)</i> - d1 Recovery rate (24h - 0h)                              | 52                 | two-tailed Student's t vs. N2 d1              | 0.0470 |
|              | <i>drp-1(tm1108);fzo-1(tm1133)</i> - d1 Recovery rate (24h - 0h)                | 61                 | two-tailed Student's t vs. N2 d1              | 0.9375 |
|              | <i>drp-1(tm1108);eat-3(ad426)</i> - d1 Recovery rate (24h - 0h)                 | 65                 | two-tailed Student's t vs. N2 d1              | 0.1933 |
| S2A<br>(2)   | N2 - d1 0h, 1hEx, 2hEx, 4hEx, 24hRec                                            | 37, 50, 50, 51, 42 |                                               |        |
|              | <i>isp-1(qm150)</i> - d1 0h, 1hEx, 2hEx, 4hEx, 24hRec                           | 48, 47, 49, 49, 46 | two-tailed Student's t vs. N2 d1              | 0.0013 |
|              | <i>nuo-6(qm200)</i> - d1 0h, 1hEx, 2hEx, 4hEx, 24hRec                           | 44, 44, 43, 45, 51 | two-tailed Student's t vs. N2 d1              | 0.0036 |
| S2A<br>(2)   | N2 - Fitness capacity d1 (0h+ 1hEx+ 2hEx+ 4hEx)                                 | 188                |                                               |        |
|              | <i>isp-1(qm150)</i> - Fitness capacity d1 (0h+ 1hEx+ 2hEx+ 4hEx)                | 193                | two-tailed Student's t vs. N2 d1              | <.0001 |
|              | <i>nuo-6(qm200)</i> - Fitness capacity d1 (0h+ 1hEx+ 2hEx+ 4hEx)                | 176                | two-tailed Student's t vs. N2 d1              | <.0001 |
| S2B<br>(2)   | N2 - d1 0h, 1hEx, 2hEx, 4hEx, 24hRec                                            | 37, 50, 50, 51, 42 |                                               |        |
|              | <i>daf-2(e1370)</i> - d1 0h, 1hEx, 2hEx, 4hEx, 24hRec                           | 47, 48, 47, 49, 45 | two-tailed Student's t vs. N2 d1              | 0.0080 |
|              | <i>eat-2(ad1116)</i> - d1 0h, 1hEx, 2hEx, 4hEx, 24hRec                          | 34, 41, 36, 40, 33 | two-tailed Student's t vs. N2 d1              | 0.0193 |
| S2B<br>(2)   | N2 - Fitness capacity d1 (0h+ 1hEx+ 2hEx+ 4hEx)                                 | 188                |                                               |        |
|              | <i>daf-2(e1370)</i> - Fitness capacity d1 (0h+ 1hEx+ 2hEx+ 4hEx)                | 191                | two-tailed Student's t vs. N2 d1              | <.0001 |
|              | <i>eat-2(ad1116)</i> - Fitness capacity d1 (0h+ 1hEx+ 2hEx+ 4hEx)               | 151                | two-tailed Student's t vs. N2 d1              | 0.0001 |
| S2C<br>(2)   | N2 - d1 Recovery rate (24h - 0h)                                                | 37                 |                                               |        |
|              | <i>isp-1(qm150)</i> - d1 Recovery rate (24h - 0h)                               | 48                 | two-tailed Student's t vs. N2 d1              | 0.2348 |
|              | <i>nuo-6(qm200)</i> - d1 Recovery rate (24h - 0h)                               | 44                 | two-tailed Student's t vs. N2 d1              | <.0001 |
| S2D<br>(2)   | N2 - d1 Recovery rate (24h - 0h)                                                | 37                 |                                               |        |
|              | <i>daf-2(e1370)</i> - d1 Recovery rate (24h - 0h)                               | 47                 | two-tailed Student's t vs. N2 d1              | 0.0002 |
|              | <i>eat-2(ad1116)</i> - d1 Recovery rate (24h - 0h)                              | 34                 | two-tailed Student's t vs. N2 d1              | 0.3982 |
| S2E<br>(2)   | <i>isp-1(qm150)</i> - Control d1                                                | 21                 |                                               |        |
|              | <i>isp-1(qm150)</i> - Exercise d1                                               | 22                 | two-tailed Student's t vs. Control d1         | 0.9172 |
|              | <i>isp-1(qm150)</i> - Control d10                                               | 33                 |                                               |        |
|              | <i>isp-1(qm150)</i> - Exercise d10                                              | 33                 | two-tailed Student's t vs. Control d10        | 0.5897 |
| S2E<br>(2)   | <i>nuo-6(qm200)</i> - Control d1                                                | 31                 |                                               |        |
|              | <i>nuo-6(qm200)</i> - Exercise d1                                               | 32                 | two-tailed Student's t vs. Control d1         | 0.6668 |
|              | <i>nuo-6(qm200)</i> - Control d10                                               | 33                 |                                               |        |
|              | <i>nuo-6(qm200)</i> - Exercise d10                                              | 19                 | two-tailed Student's t vs. Control d10        | 0.4912 |

|            |                                                                                 |     |                                               |        |
|------------|---------------------------------------------------------------------------------|-----|-----------------------------------------------|--------|
| S2F<br>(2) | <i>daf-2(e1370)</i> - Control d1                                                | 29  |                                               |        |
|            | <i>daf-2(e1370)</i> - Exercise d1                                               | 28  | two-tailed Student's t vs. Control d1         | 0.6613 |
|            | <i>daf-2(e1370)</i> - Control d10                                               | 34  |                                               |        |
|            | <i>daf-2(e1370)</i> - Exercise d10                                              | 24  | two-tailed Student's t vs. Control d10        | 0.5942 |
| S2F<br>(2) | <i>eat-2(ad1116)</i> - Control d1                                               | 29  |                                               |        |
|            | <i>eat-2(ad1116)</i> - Exercise d1                                              | 28  | two-tailed Student's t vs. Control d1         | 0.5150 |
|            | <i>eat-2(ad1116)</i> - Control d10                                              | 31  |                                               |        |
|            | <i>eat-2(ad1116)</i> - Exercise d10                                             | 23  | two-tailed Student's t vs. Control d10        | 0.4225 |
| S2G<br>(2) | N2 - Fitness capacity d1 (0h+ 1hEx+ 2hEx+ 4hEx)                                 | 149 |                                               |        |
|            | CA-AAK-2 - Fitness capacity d1 (0h+ 1hEx+ 2hEx+ 4hEx)                           | 159 | two-tailed Student's t vs. N2 d1              | <.0001 |
| S2G<br>(2) | N2 - Fitness capacity d5 (0h+ 1hEx+ 2hEx+ 4hEx)                                 | 182 |                                               |        |
|            | CA-AAK-2 - Fitness capacity d5 (0h+ 1hEx+ 2hEx+ 4hEx)                           | 179 | two-tailed Student's t vs. N2 d5              | <.0001 |
| S2G<br>(2) | N2 - Fitness capacity d10 (0h+ 1hEx+ 2hEx+ 4hEx)                                | 174 |                                               |        |
|            | CA-AAK-2 - Fitness capacity d10 (0h+ 1hEx+ 2hEx+ 4hEx)                          | 180 | two-tailed Student's t vs. N2 d10             | <.0001 |
| S2H<br>(2) | N2 - d1 Recovery rate (24h - 0h)                                                | 38  |                                               |        |
|            | CA-AAK-2 - d1 Recovery rate (24h - 0h)                                          | 40  | two-tailed Student's t vs. N2 d1              | 0.1443 |
| S2H<br>(2) | N2 - d5 Recovery rate (24h - 0h)                                                | 45  |                                               |        |
|            | CA-AAK-2 - d5 Recovery rate (24h - 0h)                                          | 45  | two-tailed Student's t vs. N2 d5              | 0.0264 |
| S2H<br>(2) | N2 - d10 Recovery rate (24h - 0h)                                               | 44  |                                               |        |
|            | CA-AAK-2 - d10 Recovery rate (24h - 0h)                                         | 44  | two-tailed Student's t vs. N2 d10             | 0.0155 |
| S3A<br>(2) | N2 - Fitness capacity d1 (0h+ 1hEx+ 2hEx+ 4hEx)                                 | 149 |                                               |        |
|            | <i>aak-2(gt33)</i> - Fitness capacity d1 (0h+ 1hEx+ 2hEx+ 4hEx)                 | 154 | two-tailed Student's t vs. N2 d1              | <.0001 |
| S3B<br>(2) | N2 - d1 Recovery rate (24h - 0h)                                                | 38  |                                               |        |
|            | <i>aak-2(gt33)</i> - d1 Recovery rate (24h - 0h)                                | 38  | two-tailed Student's t vs. N2 d1              | 0.0010 |
| S3C<br>(3) | <i>drp-1(tm1108)</i> - Overall capacity (d1+d5+d10+d15)                         | 229 |                                               |        |
|            | CA-AAK-2; <i>drp-1(tm1108)</i> - Overall capacity (d1+d5+d10+d15)               | 261 | two-tailed Student's t vs. <i>drp-1</i>       | 0.5522 |
| S3C<br>(3) | <i>fzo-1(tm1133)</i> - Overall capacity (d1+d5+d10+d15)                         | 210 |                                               |        |
|            | CA-AAK-2; <i>fzo-1(tm1133)</i> - Overall capacity (d1+d5+d10+d15)               | 270 | two-tailed Student's t vs. <i>fzo-1</i>       | <.0001 |
| S3C<br>(3) | <i>drp-1(tm1108);fzo-1(tm1133)</i> - Overall capacity (d1+d5+d10+d15)           | 252 |                                               |        |
|            | CA-AAK-2; <i>drp-1(tm1108);fzo-1(tm1133)</i> - Overall capacity (d1+d5+d10+d15) | 237 | two-tailed Student's t vs. <i>drp-1;fzo-1</i> | 0.7733 |
